# Supplementary material for: Interpatient Heterogeneity in Drug Response and Protein Biomarker Expression of Recurrent Ovarian Cancer
Source: MDPI journal article supplement (doi:10.3390/cancers14092279), 2022-05-03
Supplement: s1 [file s1]

# Supplemental Material

**Table S1.** Antibodies and detection systems.

| Antigen                                                       | Antibody/<br>Clone | Species              | Isotype         | Working concentration<br>µg/ml | Kit | Source             |
|---------------------------------------------------------------|--------------------|----------------------|-----------------|--------------------------------|-----|--------------------|
| EGF-R                                                         | H11                | m                    | IgG1            | 2.94                           | -   | Dako               |
| Her2/neu                                                      | 4B5                | r                    | IgG1            | 1.5                            | -   | Novocastra         |
| ERα                                                           | 1D5                | m                    | IgG1            | 2.5                            | +   | Dako               |
| PR                                                            | PgR636             | m                    | IgG1            | 2.5                            | +   | Dako               |
| IGF1R                                                         | 24-31              | m                    | IgG1            | 4.0                            | +   | Dako               |
| HGFR                                                          | SP44               | r                    | IgG1            | 2.12                           | -   | Biomol             |
| EpCAM                                                         | Ber-EP4            | m                    | IgG1            | 2.5                            | -   | Dako               |
| α2β1                                                          | BHA2.1             | m                    | IgG1            | 2.5                            | -   | Millipore          |
| αVβ3                                                          | LM609              | m                    | IgG1            | 5.0                            | -   | Millipore          |
| MUC1                                                          | Ma55.2             | m                    | IgG1            | 0.5                            | -   | Novocastra         |
| CD44v6                                                        | VFF-18             | m                    | IgG1            | 1.0                            | -   | eBioscience        |
| HSP90                                                         | AC88               | m                    | IgG1            | 10                             | +   | Abcam              |
| Ribosomal<br>protein S6                                       | rpS6 poly          | r                    | poly-<br>clonal | 0.24                           | -   | Cell Signaling     |
| PD-L1                                                         | MIH1               | m                    | IgG1            | 10                             | +   | Affymetrix         |
| <b>Positive control</b>                                       |                    |                      |                 |                                |     |                    |
| Pan<br>Cytokeratin                                            | KL-1               | m                    | IgG1            | 0.32                           | -   | Zytomed<br>Systems |
| <b>Negative controls</b>                                      |                    |                      |                 |                                |     |                    |
|                                                               | MOPC-21            | m                    | IgG1            | 2.5, 5.0                       | -   | Sigma-Aldrich      |
|                                                               | MOPC-21            | m                    | IgG1            | 10                             | +   |                    |
|                                                               | DA1E               | r                    | IgG1            | 2.12                           | -   | Cell Signaling     |
|                                                               | Rabbit serum       | r                    | Poly-<br>clonal | 0.24                           | -   | Dako               |
| <b>Biotinylated secondary antibodies and detection system</b> |                    |                      |                 |                                |     |                    |
|                                                               | 315-065-048        | r anti m<br>biotin   | IgG+IgM         | 0.75                           | -   | Dianova            |
|                                                               | 111-065-144        | g anti r<br>biotin   | IgG             | 7                              | -   | Dianova            |
|                                                               | 016-030-084        | POX-strept<br>avidin | -               | 1                              | -   | Dianova            |

**Legend:** m, mouse; r, rabbit; g, goat; POX-streptavidin, peroxidase-conjugated streptavidin.

**Table S2.** Mean cell viability [%] +/- SD of recurrent ovarian cancer after therapy analyzed in the ovarian cancer spheroid model

| Patient | Localisation                         | Therapies    |                             |                              |                      |               |                |              |               |               |              |               |
|---------|--------------------------------------|--------------|-----------------------------|------------------------------|----------------------|---------------|----------------|--------------|---------------|---------------|--------------|---------------|
|         |                                      | Carboplatin  | Carboplatin +<br>Paclitaxel | Carboplatin +<br>Gemcitabine | Carboplatin +<br>PLD | Paclitaxel    | Gemcitabine    | PLD          | Topotecan     | Etoposide     | Treosulfan   | Vinorelbine   |
| 1       | Peritoneum 1                         | 58,45 ± 5,34 | 55,98 ± 2,86                | 48,45 ± 4,61                 | 49,14 ± 7,01         | 94,39 ± 13,70 | 82,88 ± 9,56   | 77,05 ± 5,90 | 69,72 ± 18,60 | n.t.          | 26,67 ± 2,76 | 63,05 ± 11,56 |
| 2       | Peritoneum                           | 75,09 ± 4,18 | 55,36 ± 1,70                | 67,82 ± 8,33                 | n.t.                 | 77,33 ± 5,25  | 108,02 ± 4,17  | n.t.         | 64,10 ± 3,35  | n.t.          | 70,80 ± 4,53 | 72,17 ± 7,86  |
| 3       | Peritoneum                           | 73,35 ± 5,21 | 50,20 ± 1,45                | 58,43 ± 9,92                 | n.t.                 | 80,19 ± 17,07 | 83,30 ± 20,02  | n.t.         | 82,24 ± 12,56 | n.t.          | 45,44 ± 7,22 | 72,56 ± 8,64  |
| 4       | Peritoneum                           | 67,48 ± 6,15 | 41,97 ± 0,81                | 40,12 ± 5,25                 | n.t.                 | 67,48 ± 1,43  | 99,95 ± 6,41   | n.t.         | 54,71 ± 4,84  | n.t.          | 28,08 ± 4,39 | 47,88 ± 4,62  |
| 5       | Peritoneum 1                         | 61,06 ± 7,78 | 38,02 ± 5,06                | 29,16 ± 5,49                 | n.t.                 | 85,35 ± 5,27  | 110,36 ± 15,67 | n.t.         | 25,30 ± 2,99  | n.t.          | 3,62 ± 0,50  | 32,97 ± 2,58  |
|         | Peritoneum 2                         | 55,81 ± 6,79 | 38,81 ± 6,11                | 16,08 ± 1,25                 | n.t.                 | 95,25 ± 4,45  | 91,86 ± 8,92   | n.t.         | 47,15 ± 7,78  | n.t.          | 6,51 ± 2,29  | 51,28 ± 1,72  |
| 6       | Peritoneum                           | 57,32 ± 0,63 | 37,65 ± 3,17                | 27,06 ± 0,59                 | n.t.                 | 77,60 ± 5,05  | 100,47 ± 5,38  | n.t.         | 27,16 ± 1,20  | n.t.          | 1,90 ± 0,26  | 22,37 ± 0,91  |
| 7       | Peritoneum                           | n.t.         | 36,81 ± 4,74                | 26,07 ± 1,32                 | n.t.                 | n.t.          | n.t.           | n.t.         | n.t.          | n.t.          | 51,07 ± 5,18 | n.t.          |
| 8       | Peritoneum 1                         | 42,15 ± 3,86 | 34,42 ± 3,67                | 22,17 ± 1,83                 | 27,36 ± 2,53         | 95,26 ± 3,72  | 77,67 ± 4,26   | 90,73 ± 5,65 | 84,83 ± 0,74  | 75,17 ± 8,84  | 9,18 ± 1,04  | 57,54 ± 4,14  |
|         | Peritoneum 2                         | 41,04 ± 3,17 | 32,41 ± 1,99                | 19,02 ± 1,35                 | 29,74 ± 1,67         | 71,08 ± 8,10  | 55,06 ± 5,66   | 70,81 ± 5,33 | 77,92 ± 7,48  | 43,88 ± 6,29  | 6,98 ± 1,56  | 44,31 ± 6,34  |
| 9       | Peritoneum 1                         | 16,29 ± 1,64 | 19,40 ± 1,12                | 14,40 ± 1,74                 | 19,73 ± 9,68         | 84,06 ± 6,76  | 86,59 ± 4,54   | 84,61 ± 0,86 | 48,86 ± 7,65  | n.t.          | 17,29 ± 4,23 | 65,04 ± 0,17  |
|         | Peritoneum 2                         | 32,72 ± 3,05 | 31,62 ± 1,90                | 12,27 ± 1,38                 | 25,49 ± 1,83         | 76,21 ± 3,35  | 71,56 ± 0,92   | 74,68 ± 4,02 | 41,51 ± 3,28  | n.t.          | 11,40 ± 4,32 | 64,04 ± 5,70  |
| 10      | Peritoneum 1                         | 39,10 ± 1,63 | 22,10 ± 4,20                | 19,20 ± 3,23                 | 28,30 ± 1,15         | 73,71 ± 0,96  | 107,05 ± 18,69 | 61,75 ± 6,11 | 51,33 ± 7,79  | 55,57 ± 3,51  | 14,02 ± 1,40 | 34,90 ± 4,35  |
|         | Peritoneum 2                         | 58,15 ± 5,19 | 29,97 ± 4,41                | 41,25 ± 7,41                 | 57,20 ± 5,94         | 53,28 ± 4,03  | 102,99 ± 12,72 | 62,36 ± 7,03 | 55,56 ± 7,54  | 39,21 ± 14,19 | 22,81 ± 4,22 | 46,11 ± 7,65  |
|         | Omentum                              | 36,22 ± 3,23 | 22,54 ± 1,14                | 9,63 ± 2,09                  | 31,06 ± 4,17         | 94,73 ± 10,90 | 76,23 ± 6,13   | 77,71 ± 0,30 | 35,69 ± 4,87  | 63,79 ± 1,55  | 5,77 ± 2,07  | 14,76 ± 1,93  |
| 11      | Peritoneum                           | 28,79 ± 3,07 | 21,95 ± 3,31                | 15,23 ± 2,23                 | n.t.                 | 62,48 ± 3,32  | 59,96 ± 8,31   | n.t.         | 56,24 ± 3,69  | n.t.          | 14,96 ± 1,60 | 63,06 ± 4,37  |
| 12      | Intraparenchymatous<br>tissue, liver | 36,11 ± 3,81 | 17,23 ± 1,01                | 6,23 ± 0,76                  | 29,17 ± 5,66         | 70,02 ± 6,03  | 60,70 ± 5,41   | 75,48 ± 5,18 | 25,38 ± 2,91  | 59,22 ± 5,43  | 1,70 ± 0,34  | 11,52 ± 1,27  |
| 13      | Metastasis (Liver)                   | 28,07 ± 1,46 | 14,77 ± 0,55                | 6,85 ± 0,74                  | 19,96 ± 0,79         | 78,81 ± 2,83  | 78,76 ± 4,65   | 73,88 ± 2,51 | 31,99 ± 1,99  | n.t.          | 12,48 ± 2,58 | 22,65 ± 4,83  |
| 14      | Peritoneum 1                         | 16,86 ± 1,28 | 9,15 ± 0,99                 | 3,62 ± 0,75                  | n.t.                 | 65,81 ± 3,22  | 88,59 ± 8,37   | n.t.         | 34,80 ± 3,19  | n.t.          | 5,30 ± 0,77  | 13,82 ± 2,40  |
|         | Peritoneum 2                         | 17,81 ± 1,26 | 14,36 ± 2,71                | 6,40 ± 1,58                  | n.t.                 | 55,99 ± 8,91  | 97,07 ± 17,66  | n.t.         | 23,29 ± 4,48  | n.t.          | 5,55 ± 1,40  | 27,52 ± 2,54  |
| 15      | Peritoneum                           | 22,76 ± 1,76 | 14,24 ± 0,17                | 8,48 ± 0,65                  | 16,10 ± 0,34         | 83,74 ± 3,23  | 36,68 ± 4,08   | 92,89 ± 7,84 | 42,89 ± 3,13  | 40,32 ± 3,10  | 50,21 ± 1,65 | 114,31 ± 1,69 |
| 16      | Peritoneum                           | 8,67 ± 0,44  | 5,94 ± 0,44                 | 3,66 ± 0,07                  | n.t.                 | 52,19 ± 4,21  | 65,79 ± 1,63   | n.t.         | 25,43 ± 0,10  | n.t.          | 7,43 ± 0,58  | 33,39 ± 0,11  |
|         | Omentum minor                        | 19,11 ± 0,22 | 12,82 ± 0,75                | 7,34 ± 1,02                  | n.t.                 | 82,18 ± 4,23  | 72,63 ± 2,92   | n.t.         | 36,01 ± 1,63  | n.t.          | 5,523 ± 0,20 | 37,56 ± 2,68  |
| 17      | Peritoneum                           | 18,10 ± 0,70 | 11,46 ± 0,93                | 9,98 ± 0,49                  | 13,55 ± 0,36         | 81,24 ± 7,80  | 99,01 ± 12,95  | 78,79 ± 0,25 | 38,18 ± 0,78  | 85,97 ± 1,29  | 13,79 ± 1,66 | 48,82 ± 1,70  |
| 18      | Peritoneum                           | 13,51 ± 0,85 | 7,24 ± 0,16                 | 4,43 ± 0,13                  | n.t.                 | 66,15 ± 5,80  | 74,42 ± 2,23   | n.t.         | 37,75 ± 5,47  | 40,94 ± 7,79  | 17,45 ± 2,73 | 47,57 ± 5,29  |
| 19      | Peritoneum                           | 15,63 ± 4,19 | 7,18 ± 0,17                 | 5,99 ± 0,42                  | 6,02 ± 1,51          | 88,17 ± 11,41 | 62,41 ± 7,44   | 61,25 ± 1,22 | 76,32 ± 2,52  | 66,41 ± 5,49  | 5,67 ± 0,64  | 47,25 ± 5,04  |
| 20      | Metastasis (Liver)                   | 9,44 ± 0,29  | 5,91 ± 0,20                 | 3,64 ± 0,83                  | n.t.                 | 72,21 ± 1,56  | 75,08 ± 3,09   | n.t.         | 68,07 ± 1,10  | n.t.          | 9,77 ± 1,44  | 33,11 ± 5,55  |
| 21      | Peritoneum                           | 5,88 ± 0,74  | 4,66 ± 0,53                 | 4,19 ± 1,22                  | n.t.                 | 52,99 ± 2,48  | 75,67 ± 15,45  | n.t.         | 40,37 ± 4,58  | n.t.          | 35,03 ± 4,14 | 40,19 ± 2,70  |
| 22      | Peritoneum 1                         | 14,81 ± 1,12 | 3,69 ± 0,57                 | 1,35 ± 0,20                  | 4,66 ± 0,58          | 78,45 ± 2,39  | 52,46 ± 4,79   | 73,04 ± 3,51 | 31,76 ± 1,21  | 63,16 ± 0,68  | 2,09 ± 0,44  | 11,98 ± 0,64  |
|         | Peritoneum 2                         | 9,90 ± 1,36  | 3,73 ± 0,36                 | 3,85 ± 0,49                  | 3,88 ± 0,29          | 71,61 ± 3,69  | 69,97 ± 9,97   | 73,85 ± 2,38 | 26,89 ± 4,38  | 75,33 ± 1,74  | 4,14 ± 0,61  | 33,60 ± 0,57  |

n.t. not tested, PLD PEGylated liposomal doxorubicin, SD standard deviation, Peritoneum 1 and 2 were prepared from different locations in the peritoneal cavity

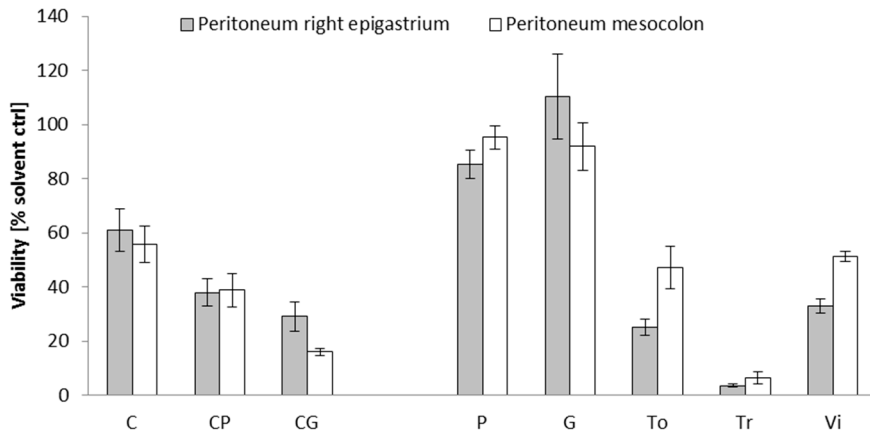

(a) Patient 5

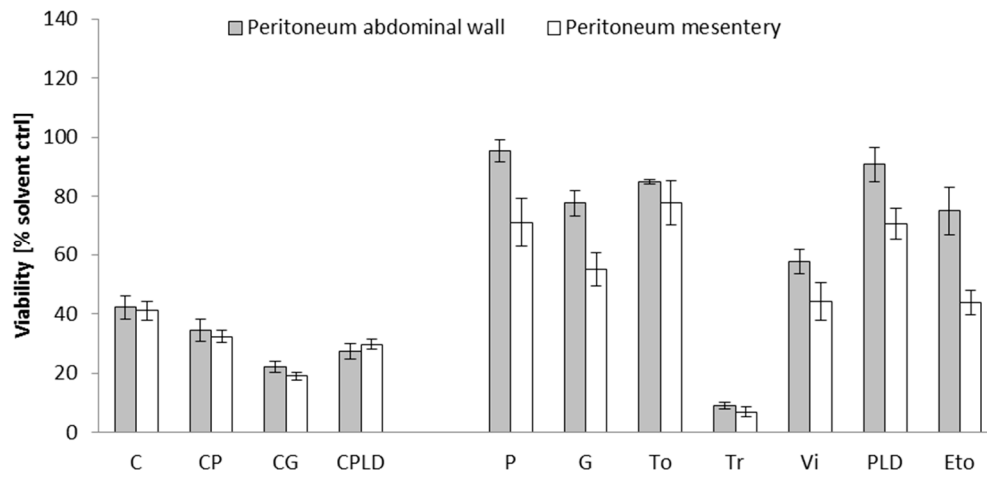

(b) Patient 8

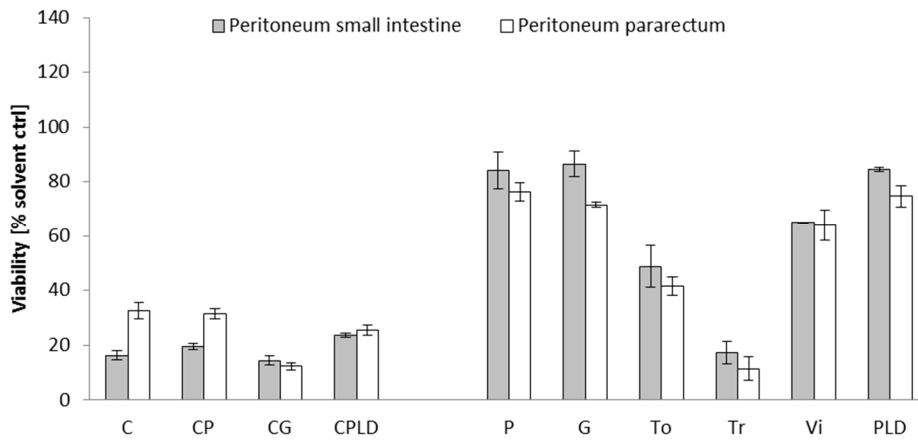

(c) Patient 9

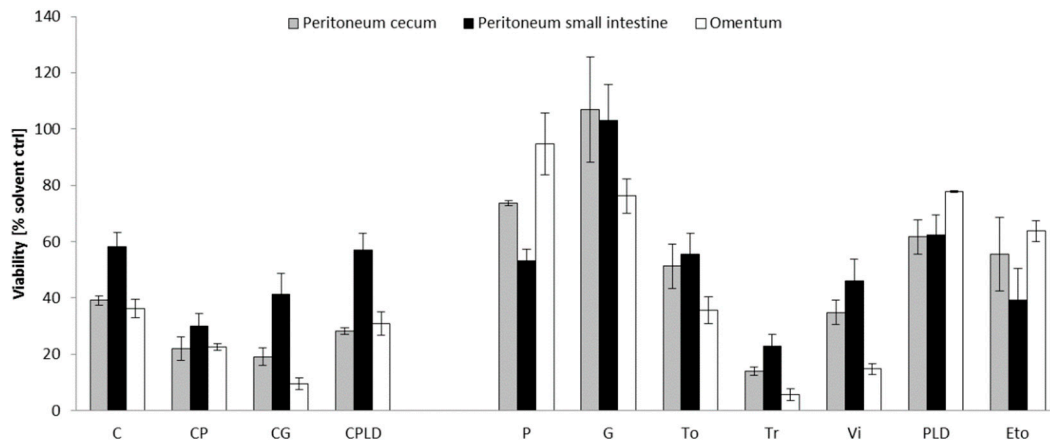

(d) Patient 10

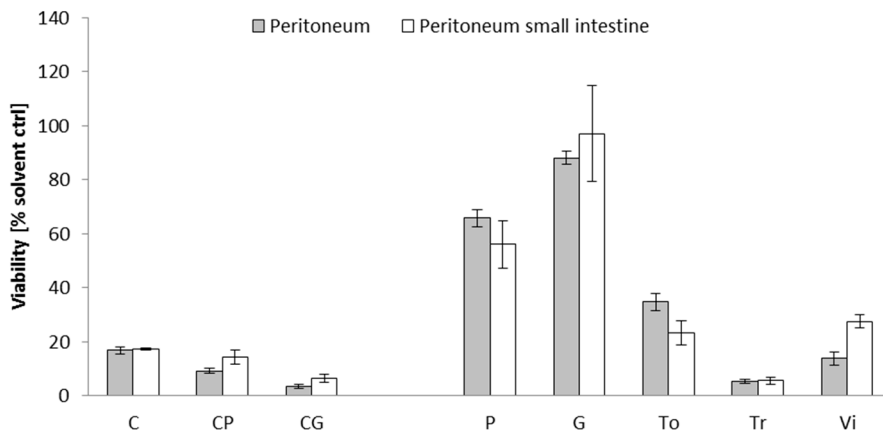

(e) Patient 14

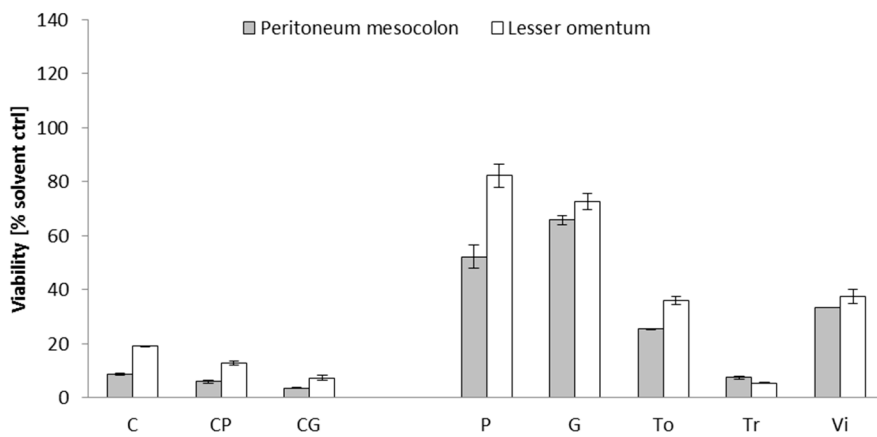

(f) Patient 16

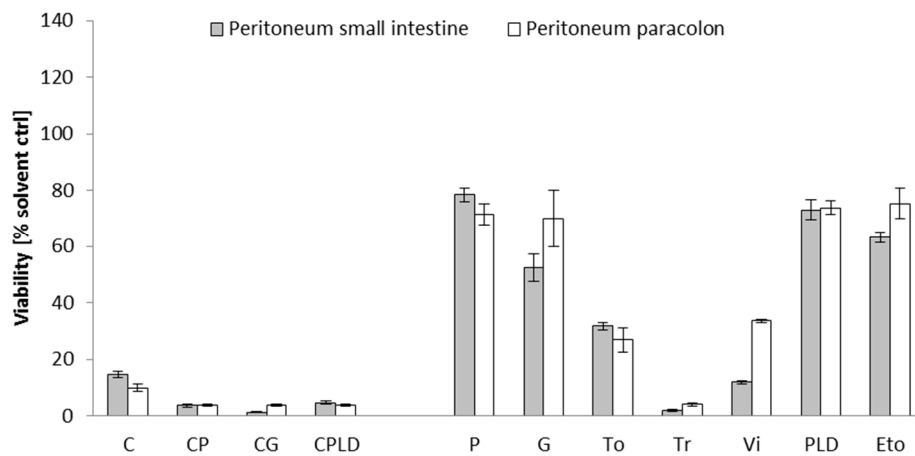

(g) Patient 22

**Figure S1.** Comparison of the treatment impact between autologous tumor samples.

Figure S2:

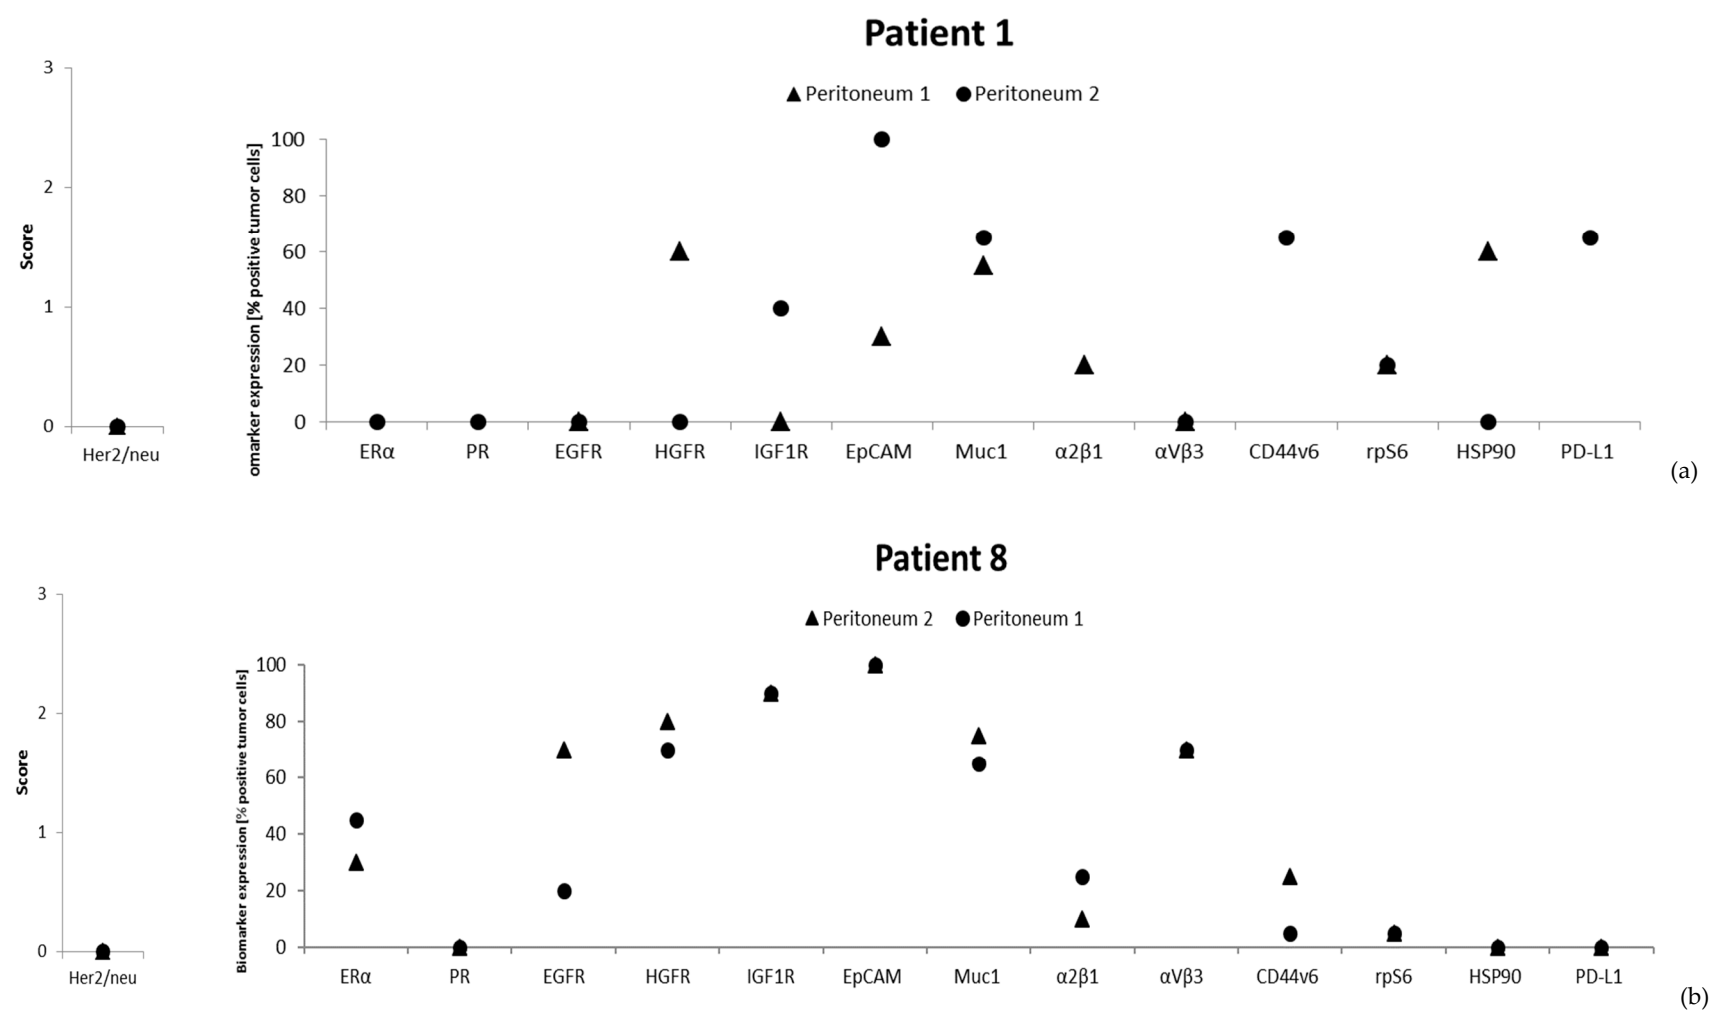

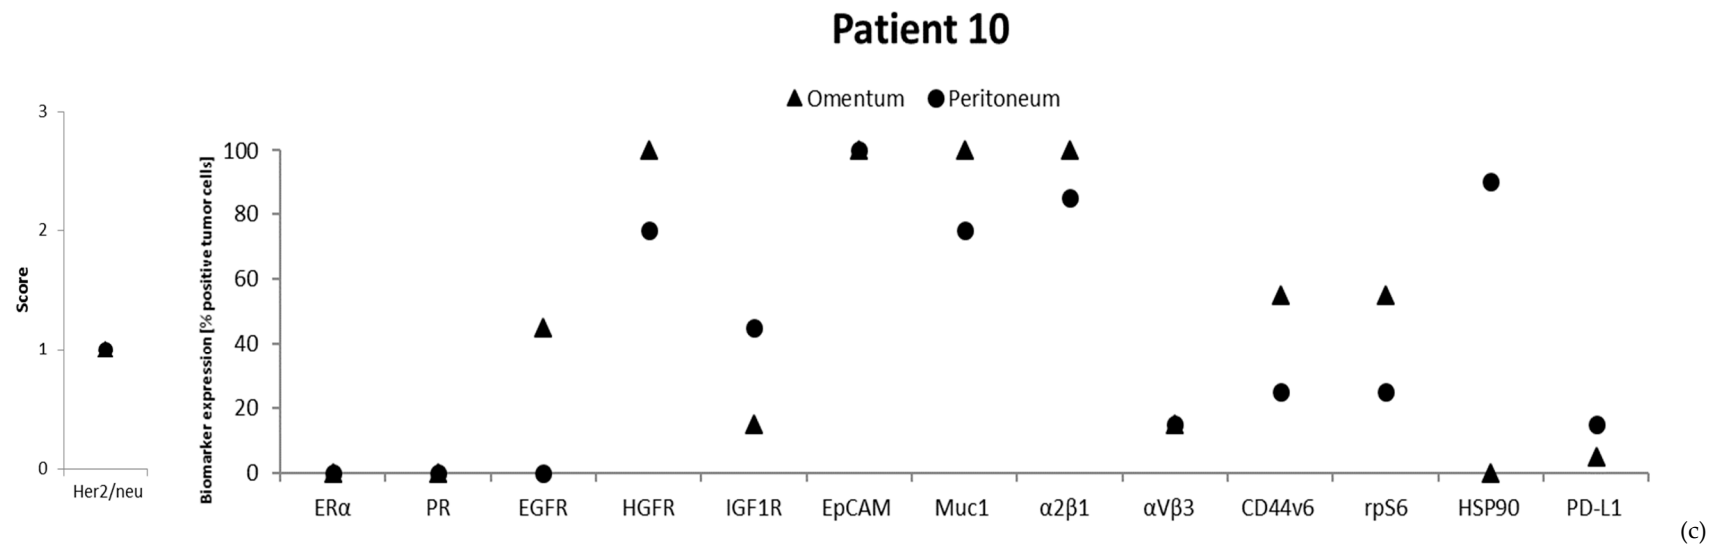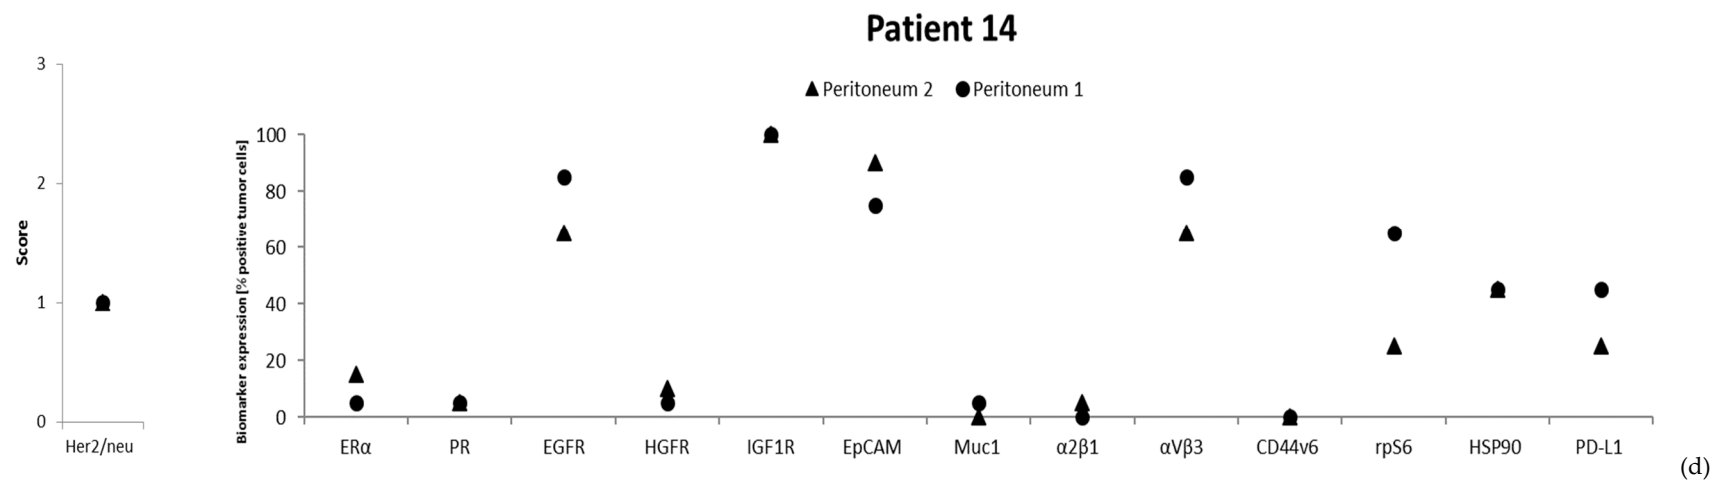

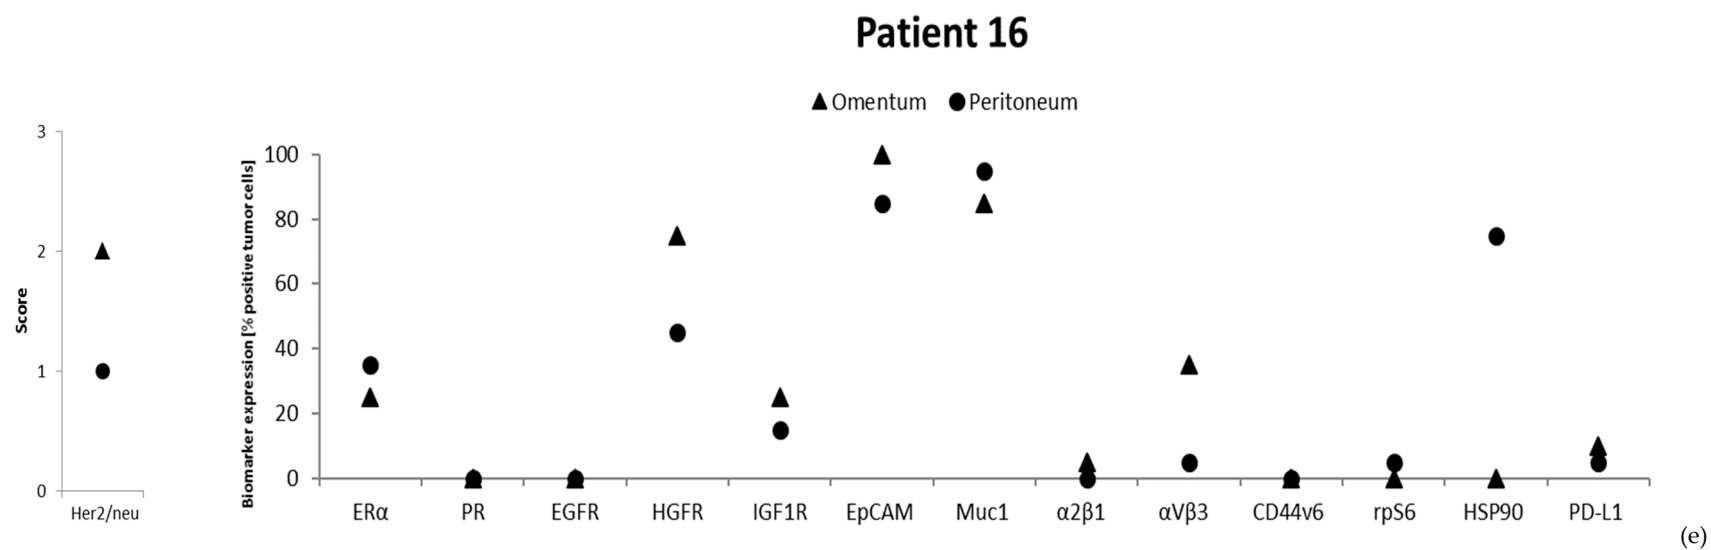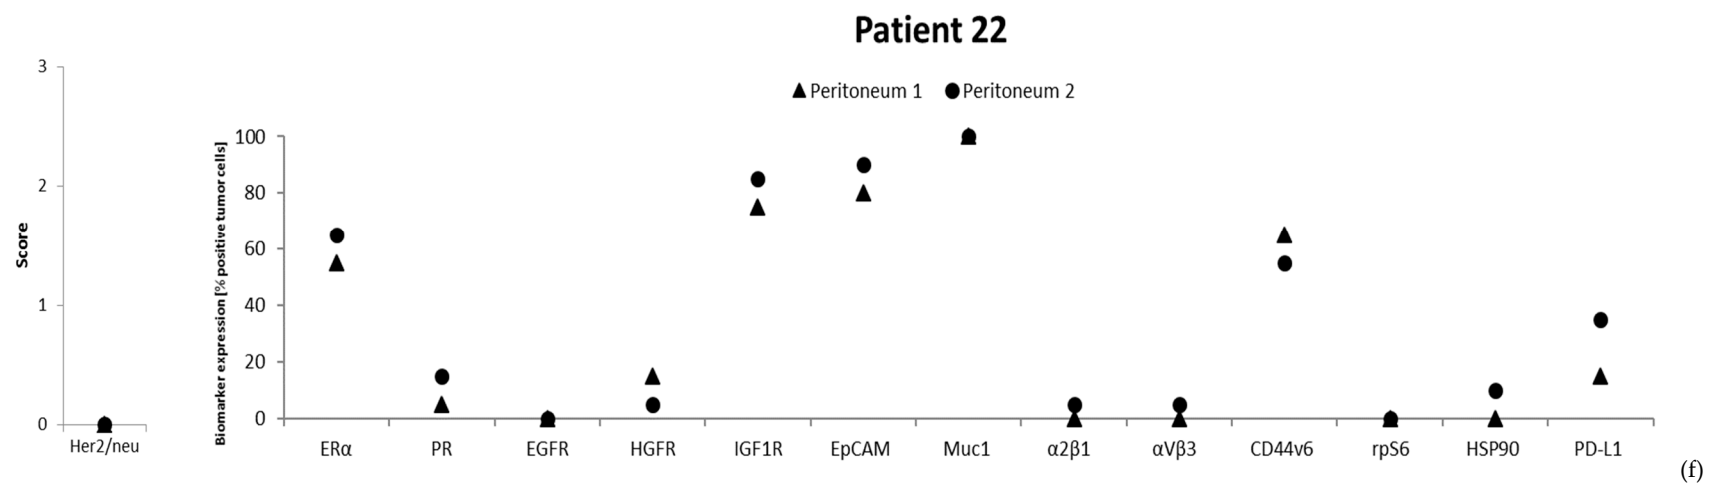

**Figure S2.** Intra-patient heterogeneity of drugable biomarker expression analyzed in recurrent ovarian cancers.



Figure S3:

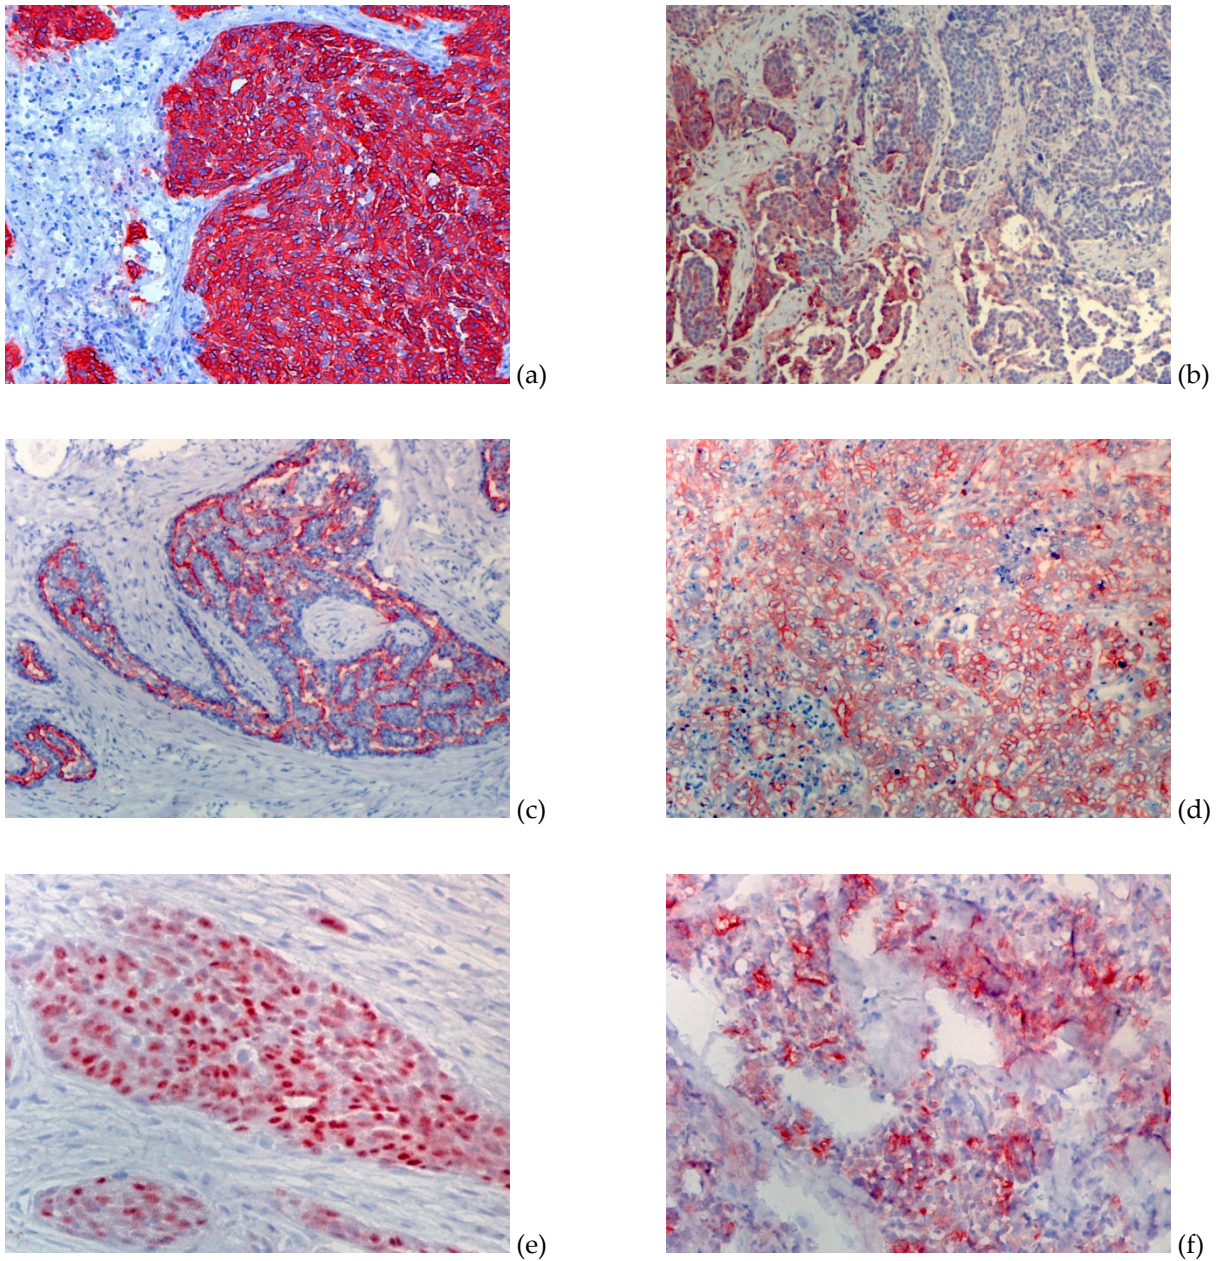

**Figure S3.** Immunohistochemical staining of different biomarkers in recurrent ovarian cancer **(a)** Staining of EpCAM of Patient 9 (100x magnification), **(b)** Staining of rpS6 of Patient 21 (100x magnification), **(c)** Staining of MUC1 of Patient 17 (100x magnification), **(d)** Staining of CD44v6 of Patient 13 (100x magnification), **(e)** Staining of ER $\alpha$  of Patient 11 (200x magnification), **(f)** Staining of Her2/neu of Patient 7 (200x magnification)



Figure S4:

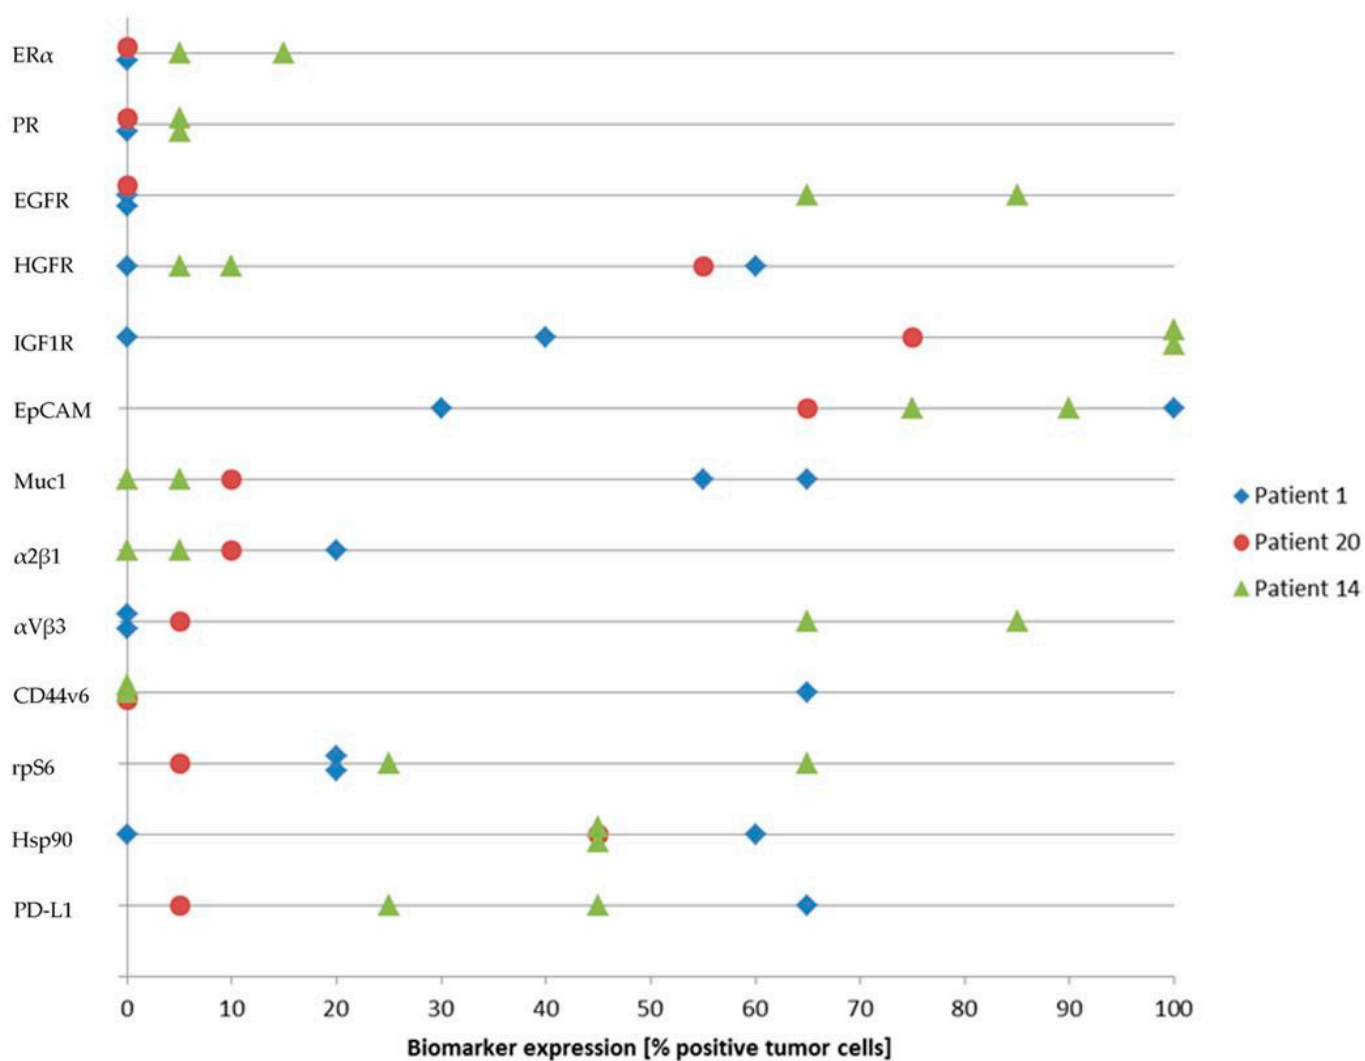

**Figure S4.** Immunohistochemical biomarker profiling in recurrent non-HGSOC ovarian cancer. Each symbol represents a tumor sample. Evaluation criteria are described in Material and Methods.
